# Supplementary material
Source: Springer Nature journal article supplement (https://www.springermedizin.de/resource/supplementary/12889_2011_4137_MOESM2_ESM.pdf/9492060)

**Figure 2 : People's views about mental illnesses**

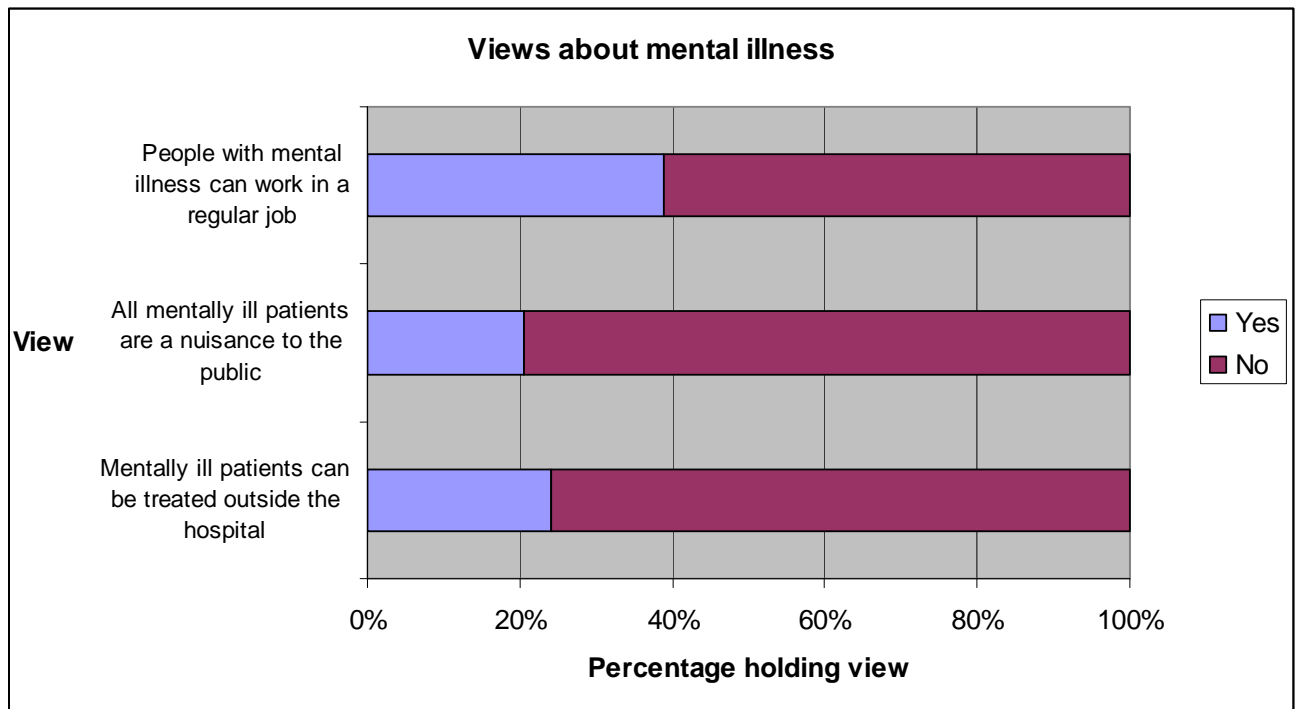

Supplement: MOESM2 [file 9492060]
